# Supplementary material
Source: Springer Nature journal article supplement (https://www.springermedizin.de/resource/supplementary/12947_2013_482_MOESM5_ESM.pdf/9555846)
Supplement: MOESM5 [file 9555846]

# Regional radial strain

Temporal smoothing  
■ minimum  
■ factory default  
■ maximum

**A**

## Anterior wall

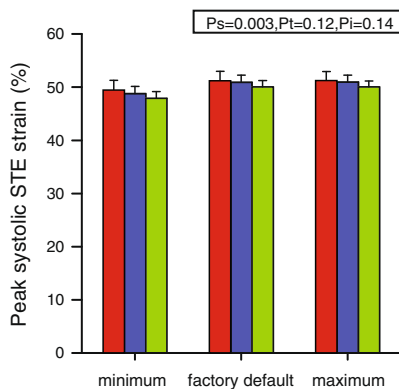**Baseline****B**

## Posterior wall

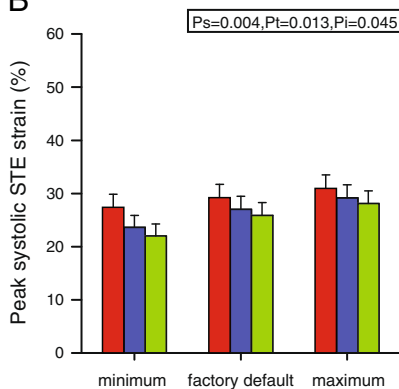**C**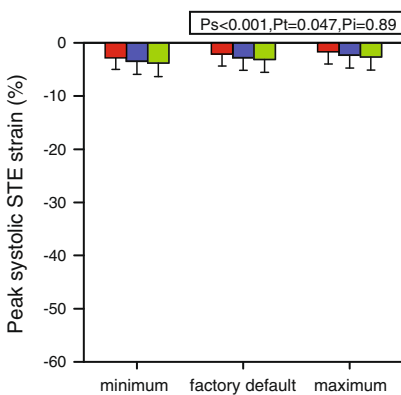**Occlusion****D**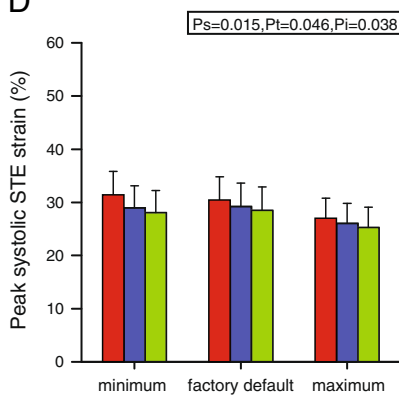**E**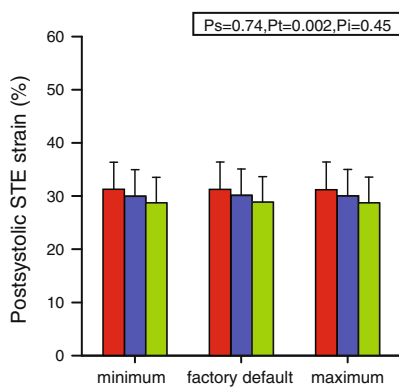**Occlusion****F**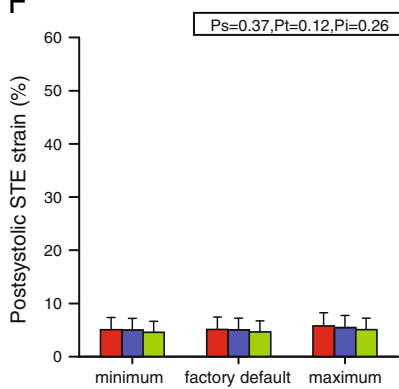**Spatial smoothing**
